# Supplementary material for: Organic amine mediated cleavage of Caromatic–Cα bonds in lignin and its platform molecules
Source: Royal Society of Chemistry journal article supplement (doi:10.1039/d1sc05231d), 2021-01-01
Supplement: d1sc05231d1.pdf [file d1sc05231d1.pdf]

## Supporting Information For

### Organic Amine Mediated Cleavage of C<sub>aromatic</sub>-C<sub>α</sub> Bond in Lignin and Its Platform Molecules

Yu Xin, Xiaojun Shen, Minghua Dong, Xiaomeng Cheng, Shulin Liu, Junjuan Yang,  
Zhenpeng Wang, Huizhen Liu, \* Buxing Han

#### This PDF file includes:

Fig. S1. The structure of bamboo lignin.

Fig. S2. <sup>1</sup>H-NMR spectrum of *p*-coumaric acid in the mixture of water and DMF solvents.

Fig. S3. <sup>1</sup>H-NMR spectrum of phenol and N,N-dimethylethylamine in the mixture of water and DMF solvents.

Fig. S4. <sup>1</sup>H-NMR spectrum of the product mixture from the reaction of *p*-coumaric acid with DMA in the mixture of water and DMF solvents at 473 K and 1 MPa Ar after 1 h reaction.

Fig. S5. GC-MS trace of the product mixture from the reaction of *p*-coumaric acid

Fig. S6. Mass spectrum of the alkylamine product.

Fig. S7. Mass spectrum of the phenol product.

Fig. S8. Mass spectrum of the 4-ethyl phenol product.

Fig. S9. Mass spectrum of the 4-vinyl phenol product.

Fig. S10. Mass spectrum of the active amine intermediate.

Fig. S11. <sup>1</sup>H-NMR spectrum of the product mixture from the reaction of *p*-coumaric acid with DMA in the mixture of water and DMF solvents at 448 K and 1 MPa Ar after 1 h reaction.

Fig. S12. The bond dissociation energy (BDE) of C<sub>aromaic</sub>-C<sub>α</sub> in two intermediates.

Fig. S13. The cleavage of C-C bond experiments. Reaction conditions: **(1)** 0.6 mmol substrate, 1.5 mL DMF, 2.5 g H<sub>2</sub>O, 473 K, 1MPa Ar, 1 h. **(2)** 0.6 mmol substrate, 40 wt% DMA in water (2.5 g), 1.5 mL DMF, 1 MPa Ar, 1 h.

Fig. S14. The GC trace of the gaseous sample after *p*-coumaric acid transformation. Reaction conditions: 0.6 mmol substrate, 1.5 mL DMF, 40 wt% DMA in water (2.5 g), 473 K, 1MPa Ar, 1 h.

Fig. S15. The GC-MS result of phenol.

Fig. S16. The GC-MS result of the reaction using D<sub>2</sub>O. Reaction condition: 0.6 mmol phenol, 2.5 g 40 wt% DMA in water, 1.5 mL DMF, 1 mL D<sub>2</sub>O, 473K, 1 MPa Ar, 1h.

Fig. S17. The GC-MS result of the reaction using D<sub>2</sub>O. Reaction condition: 0.6 mmol substrate, 2.5 g 40 wt% DMA in water, 1.5 mL DMF, 1 mL D<sub>2</sub>O, 473K, 1MPa Ar, 1h.

Fig. S18. The GC-MS result of the gaseous sample using H<sub>2</sub><sup>18</sup>O. Reaction condition: 0.6 mmol substrate, 2.5 g 40 wt% DMA in water, 1.5 mL DMF, 1 mL H<sub>2</sub><sup>18</sup>O, 473K, 1MPa Ar, 1h.

Fig. S19. The GC trace of the gaseous sample after *p*-coumaric acid transformation. Reaction conditions: 0.6 mmol substrate, 1.5 g H<sub>2</sub>O, 40 wt% DMA in water (2.5 g), 473 K, 1MPa Ar, 1 h.

Fig. S20. Product distributions for the conversion of **1h** versus time. Reaction conditions: 0.6 mmol substrate, 1.5 mL DMF, 2.5 g 40 wt% DMA in water, 473 K.

Fig. S21. The 2D-HSQC NMR spectra of the bamboo lignin in deuterated DMSO (DMSO-*d*<sub>6</sub>) before and after reaction.

Table S1. The transformation of *p*-coumaric acid in the presence of different amines.

Table S2. The transformation of *p*-coumaric acid in the presence of ammonia.

Table S3. Optimization of the reaction parameters.

## Supplementary Text

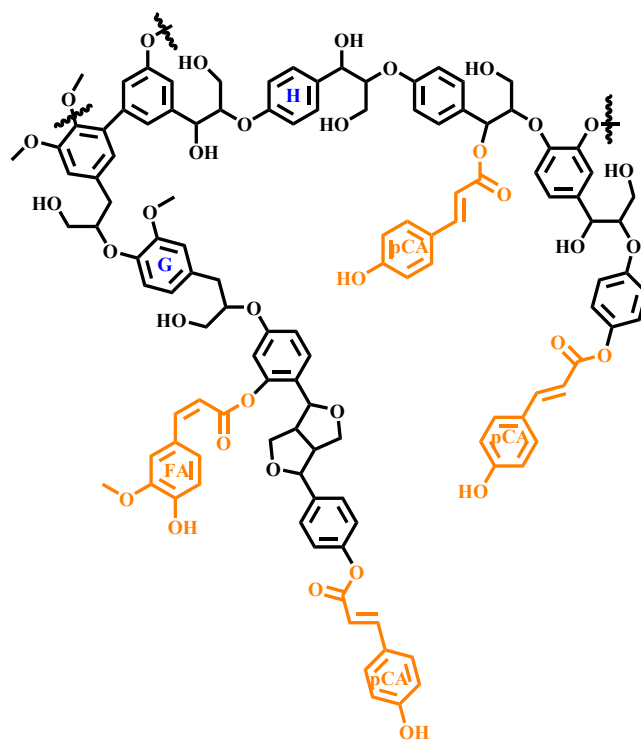

**Fig. S1.** The structure of bamboo lignin.

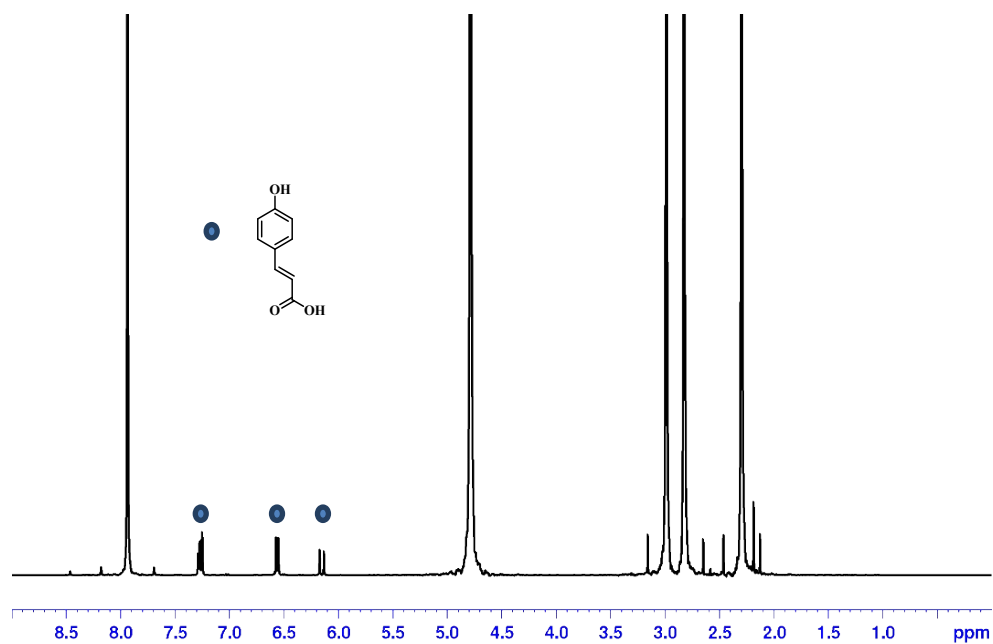

**Fig. S2.**  $^1\text{H}$ -NMR spectrum of *p*-coumaric acid in the mixture of water and DMF solvents.

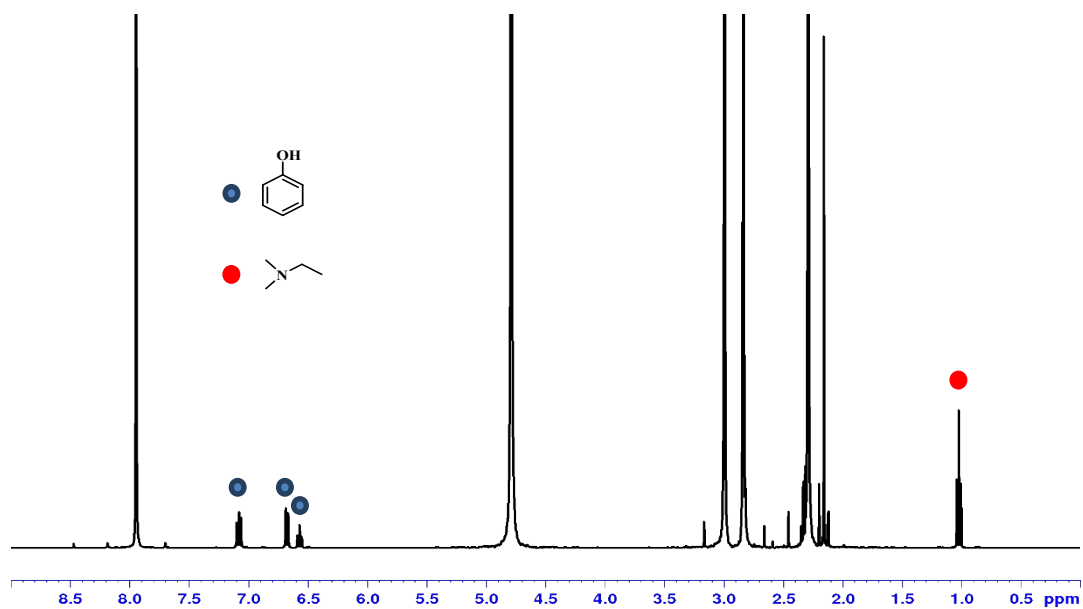

**Fig. S3.**  $^1\text{H}$ -NMR spectrum of phenol and N,N-dimethylethylamine in the mixture of water and DMF solvents.

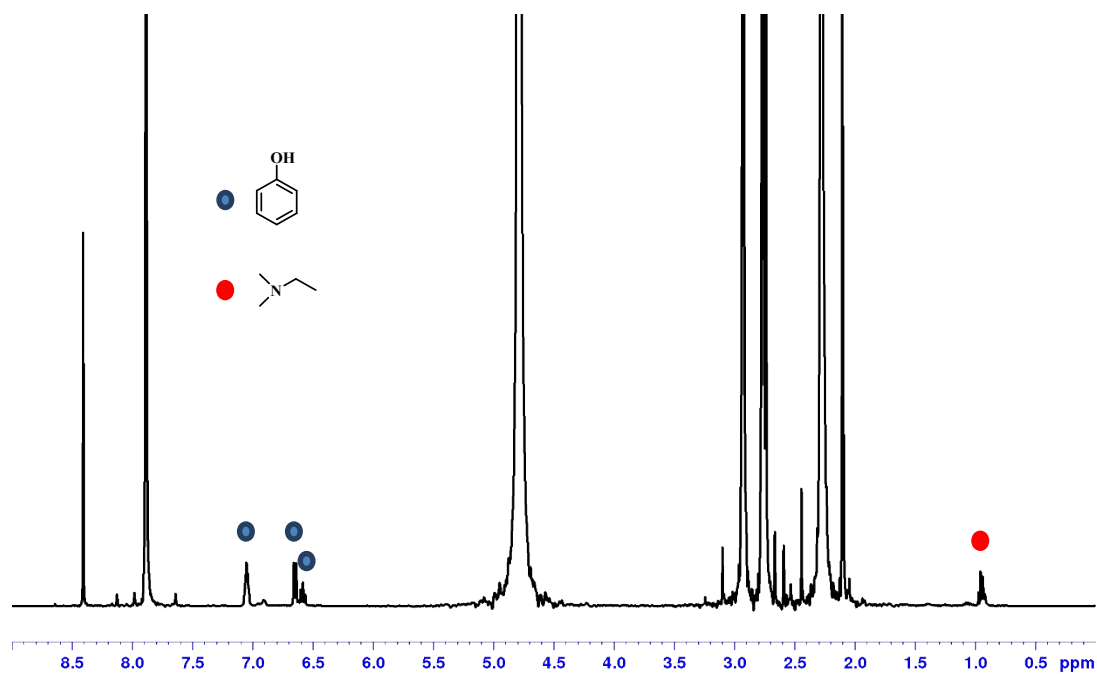

**Fig. S4.**  $^1\text{H}$ -NMR spectrum of the product mixture from the reaction of *p*-coumaric acid with DMA in the mixture of water and DMF solvents at 473 K and 1 MPa Ar after 1 h reaction.

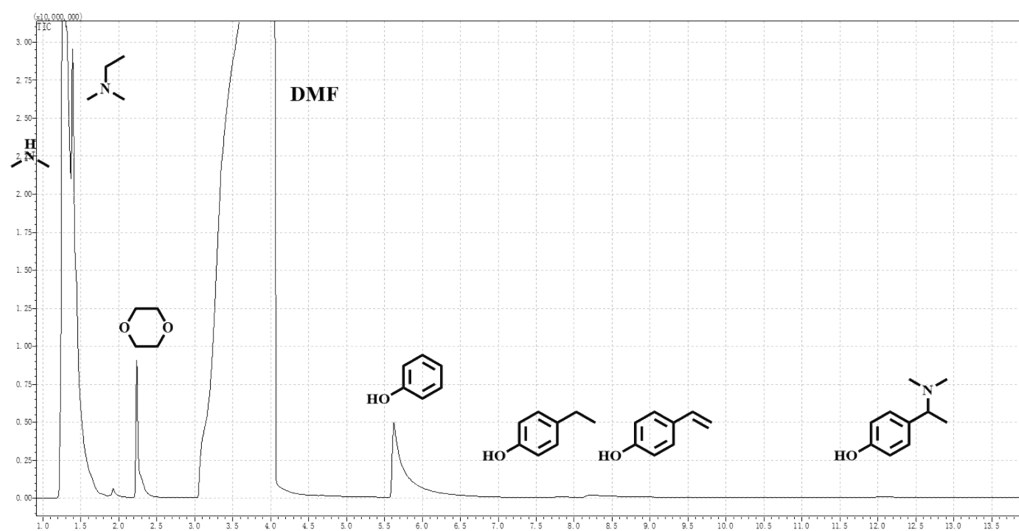

**Fig. S5.** GC-MS trace of the product mixture from the reaction of *p*-coumaric acid.

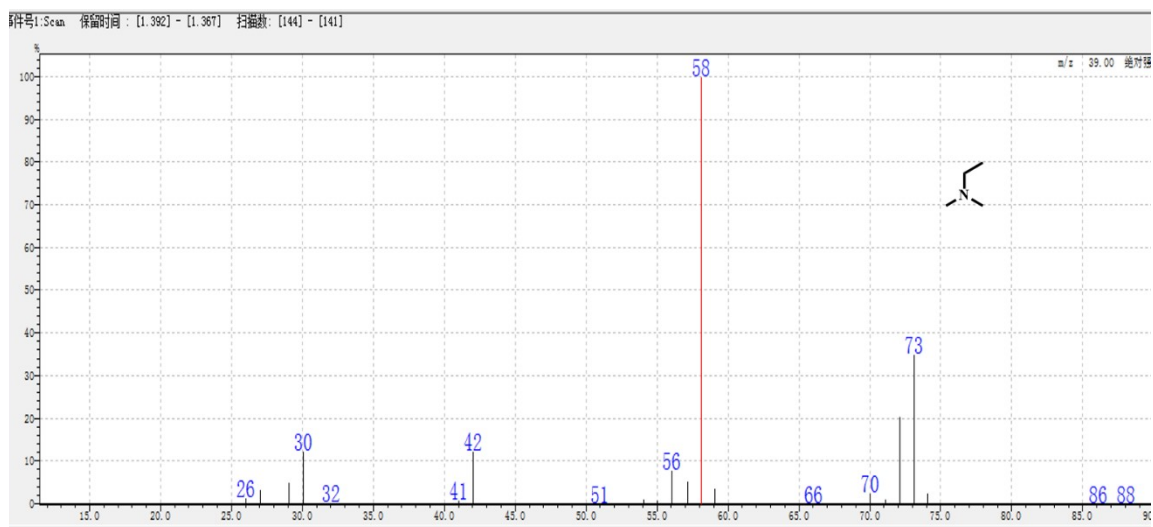

**Fig. S6.** Mass spectrum of the alkylamine product.



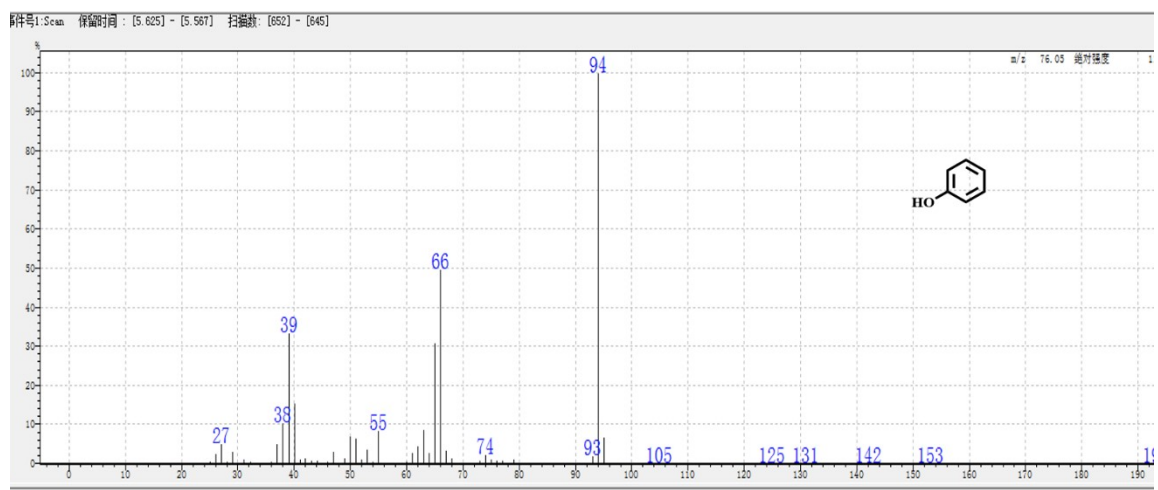

**Fig. S7.** Mass spectrum of the phenol product.

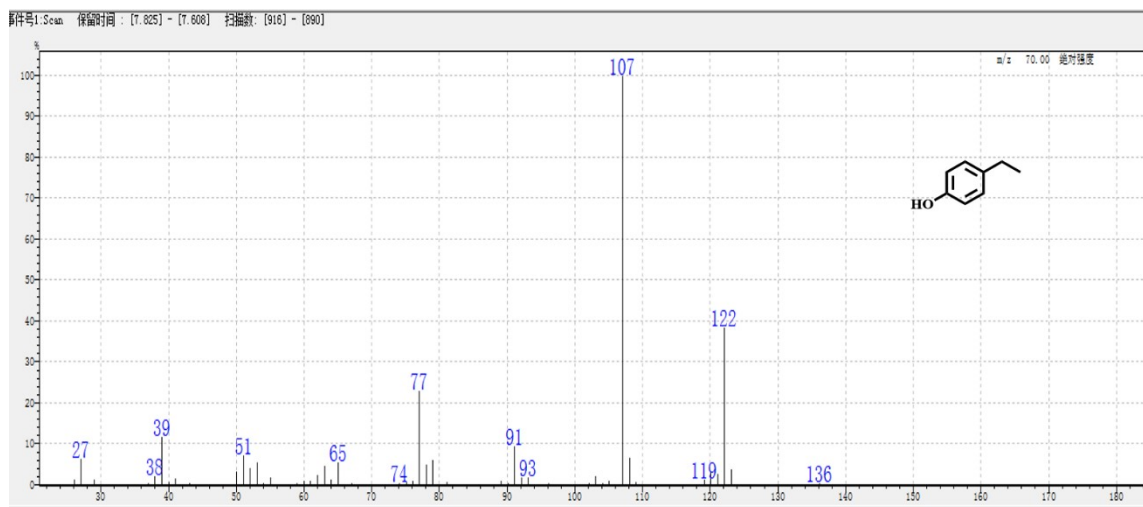

**Fig. S8.** Mass spectrum of the 4-ethyl phenol product.

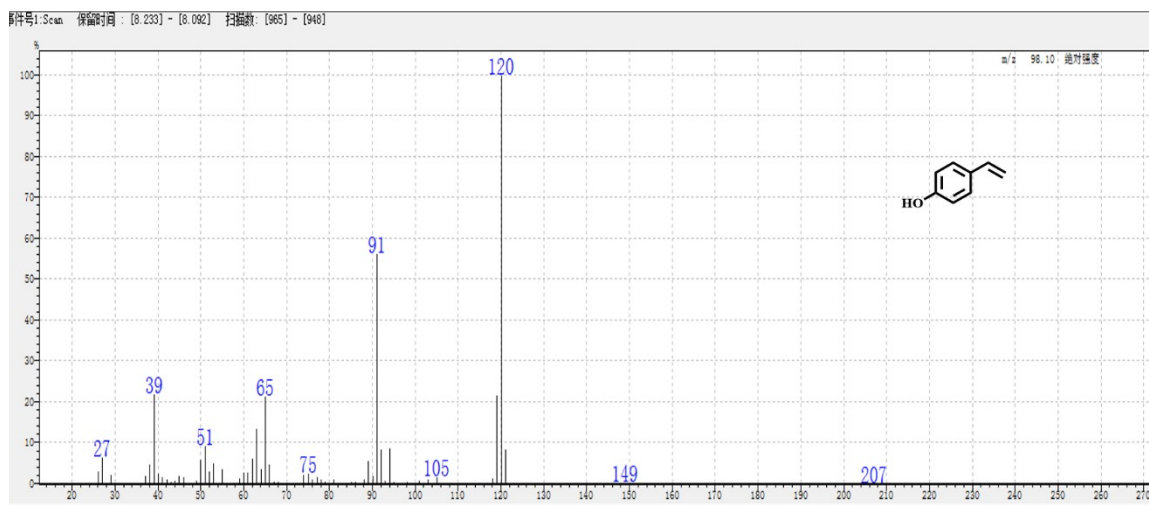

**Fig. S9.** Mass spectrum of the 4-vinyl phenol product.

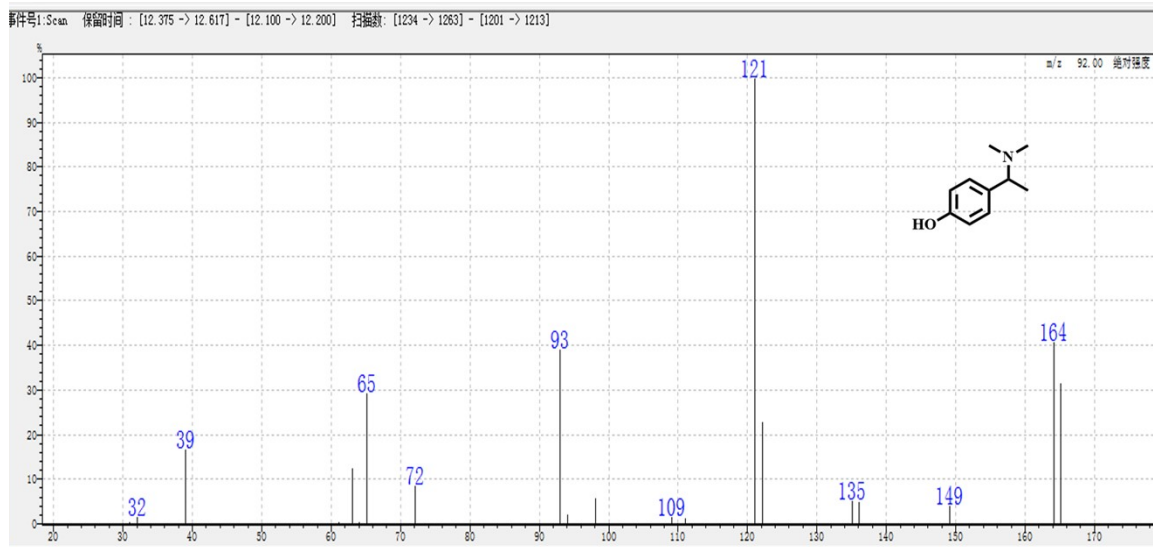

**Fig. S10.** Mass spectrum of the active amine intermediate.

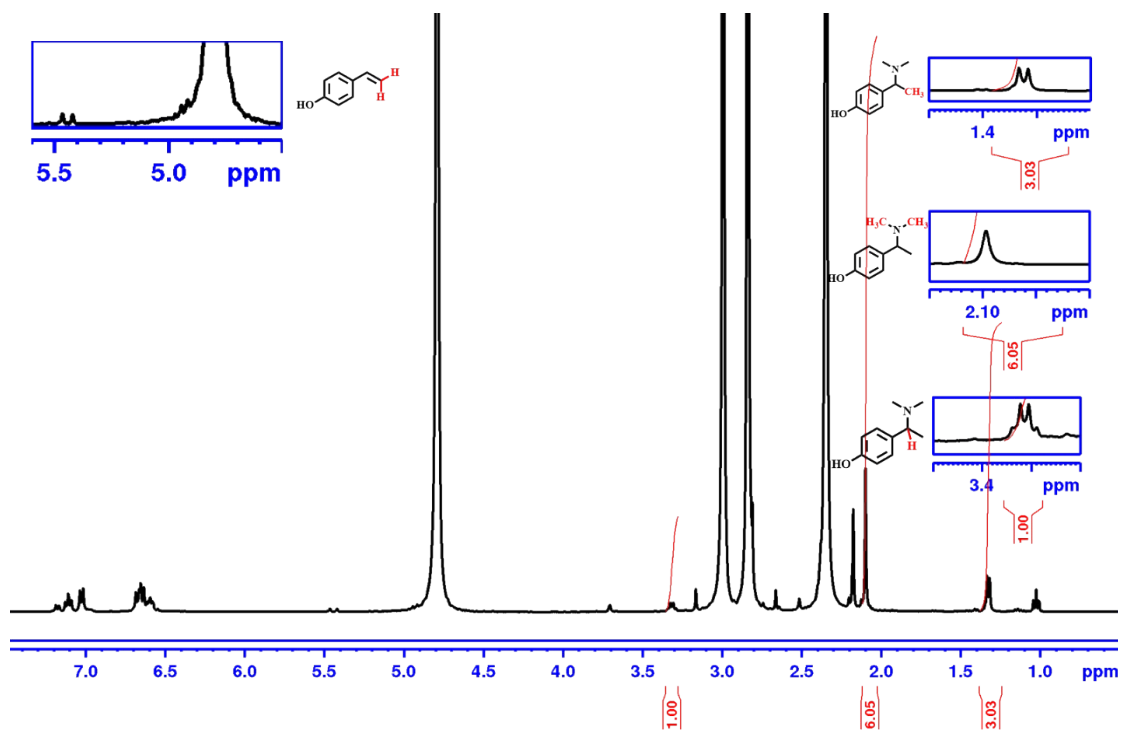

**Fig. S11.**  $^1\text{H}$ -NMR spectrum of the product mixture from the reaction of *p*-coumaric acid with DMA in the mixture of water and DMF solvents at 448 K and 1 MPa Ar after 1 h reaction.

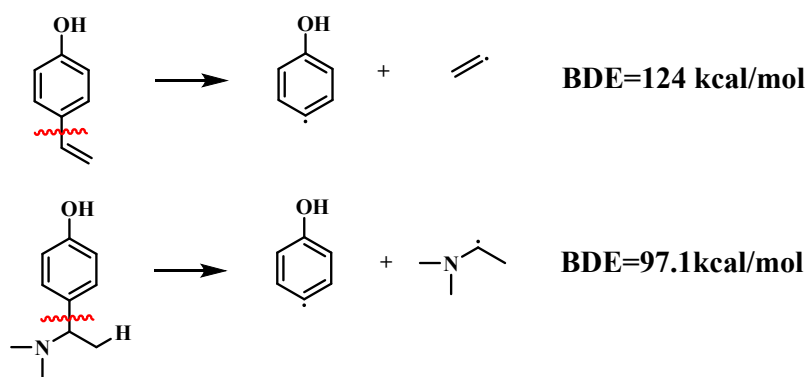

**Fig. S12.** The bond dissociation energy (BDE) of  $C_{aromatic}-C_{\alpha}$  in two intermediates.

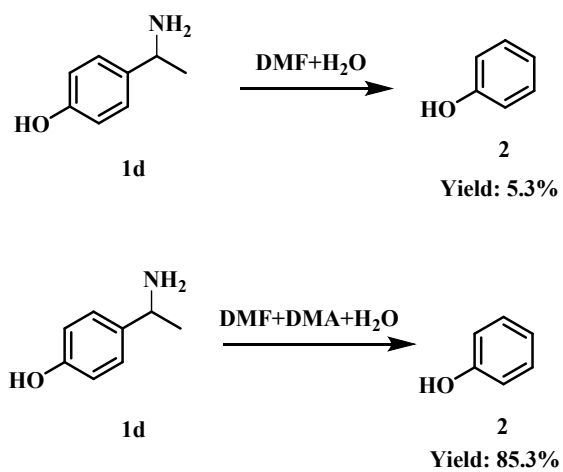

**Fig. S13.** The cleavage of C-C bond experiments. Reaction conditions: **(1)** 0.6 mmol substrate, 1.5 mL DMF, 2.5 g H<sub>2</sub>O, 473 K, 1MPa Ar, 1 h. **(2)** 0.6 mmol substrate, 40 wt% DMA in water (2.5 g), 1.5 mL DMF, 1 MPa Ar, 1 h.

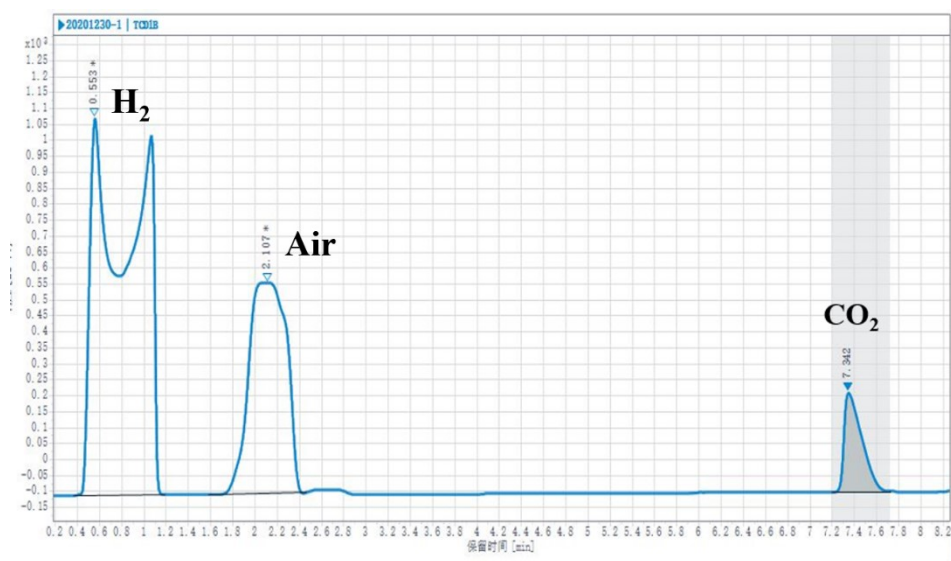

**Fig. S14.** The GC trace of the gaseous sample after *p*-coumaric acid transformation. Reaction conditions: 0.6 mmol substrate, 1.5 mL DMF, 40 wt% DMA in water (2.5 g), 473 K, 1MPa Ar, 1 h.



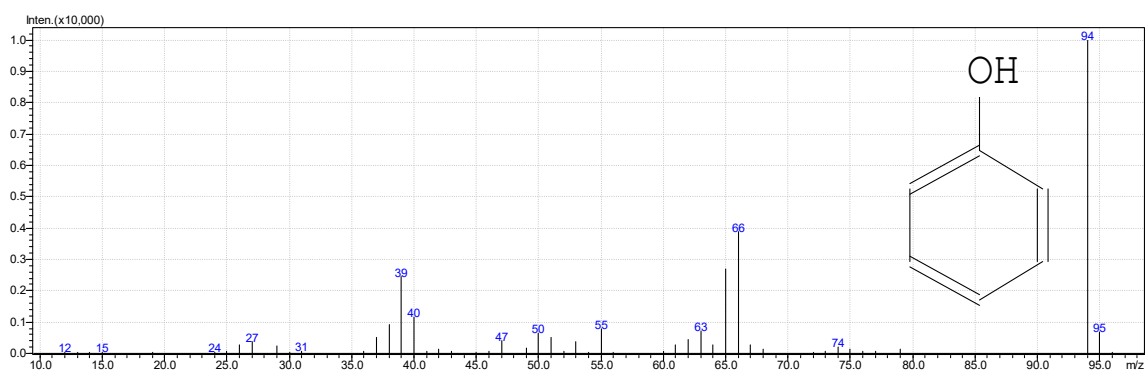

**Fig. S15:** The GC-MS result of phenol.

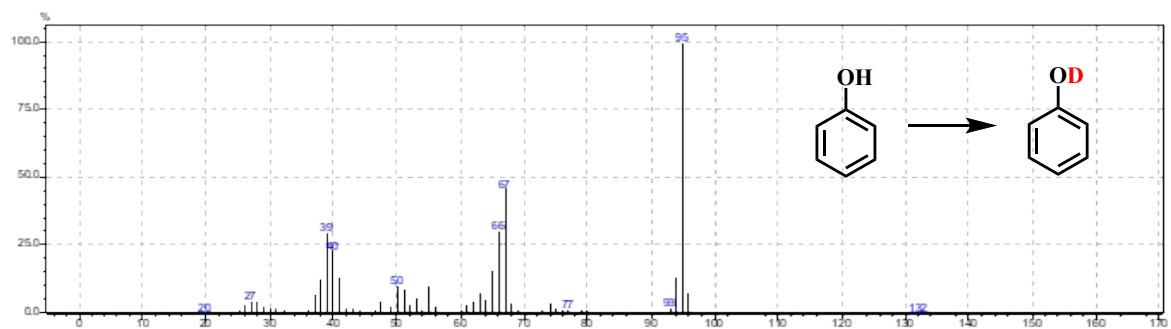

**Fig. S16:** The GC-MS result of the reaction using D<sub>2</sub>O. Reaction condition: 0.6 mmol phenol, 2.5 g 40 wt% DMA in water, 1.5 mL DMF, 1 mL D<sub>2</sub>O, 473K, 1 MPa Ar, 1h.

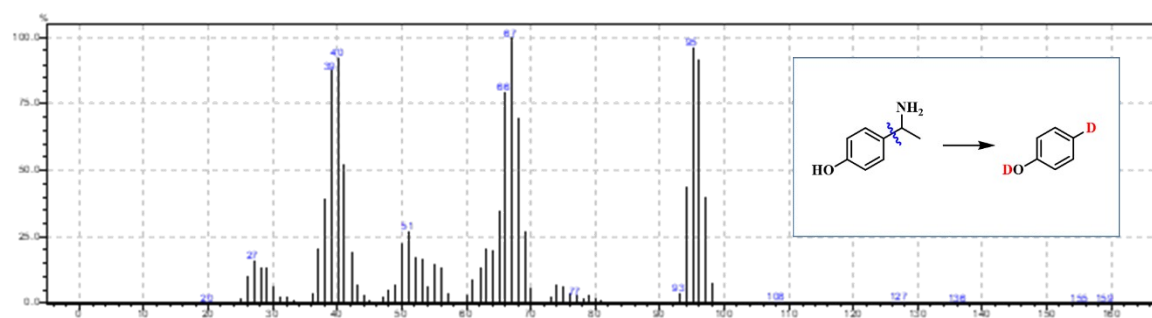

**Fig. S17:** The GC-MS result of the reaction using D<sub>2</sub>O. Reaction condition: 0.6 mmol substrate, 2.5 g 40 wt% DMA in water, 1.5 mL DMF, 1 mL D<sub>2</sub>O, 473K, 1MPa Ar, 1h.

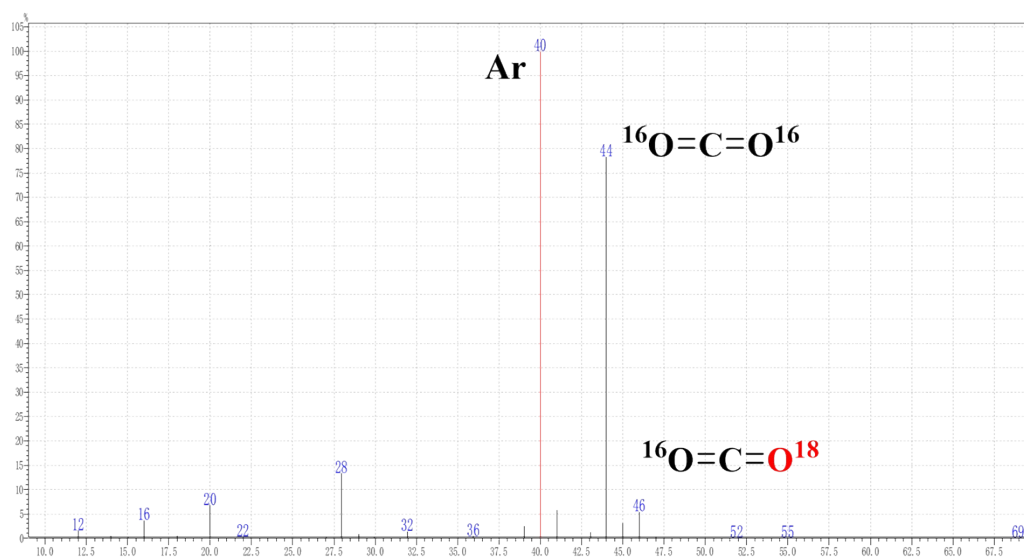

**Fig. S18:** The GC-MS result of the gaseous sample using  $\text{H}_2^{18}\text{O}$ . Reaction condition: 0.6 mmol substrate, 2.5 g 40 wt% DMA in water, 1.5 mL DMF, 1 mL  $\text{H}_2^{18}\text{O}$ , 473K, 1MPa Ar, 1h.

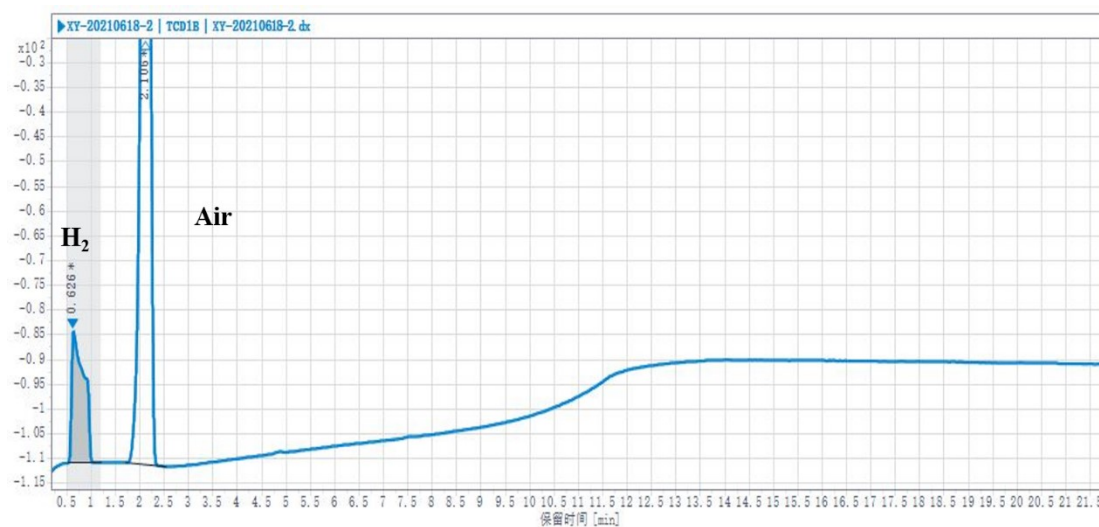

**Fig. S19.** The GC trace of the gaseous sample after *p*-coumaric acid transformation. Reaction conditions: 0.6 mmol substrate, 1.5 g  $H_2O$ , 40 wt% DMA in water (2.5 g), 473 K, 1MPa Ar, 1 h.

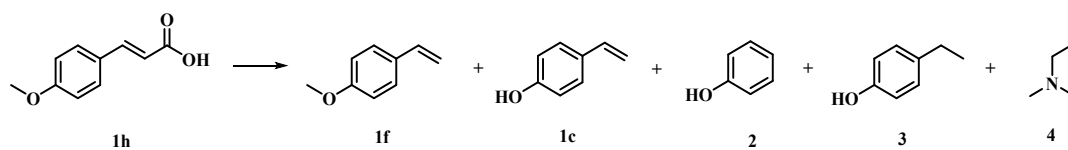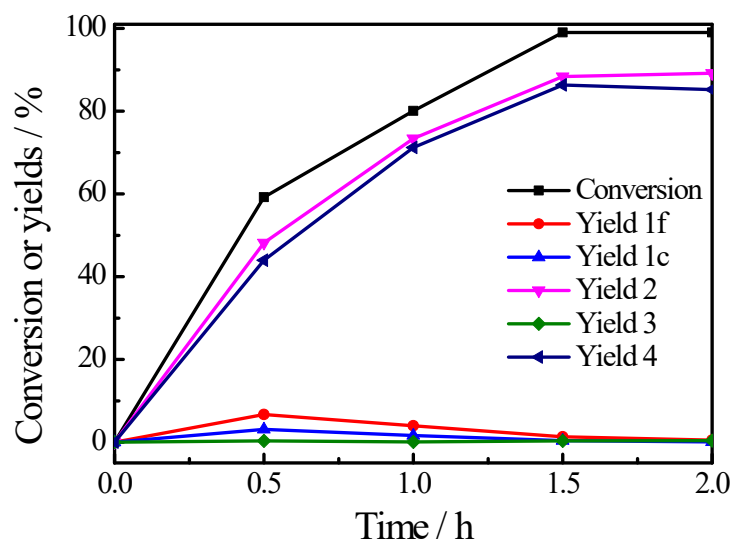

**Fig. S20.** Product distributions for the conversion of **1h** versus time. Reaction conditions: 0.6 mmol substrate, 1.5 mL DMF, 2.5 g 40 wt% DMA in water, 473 K.

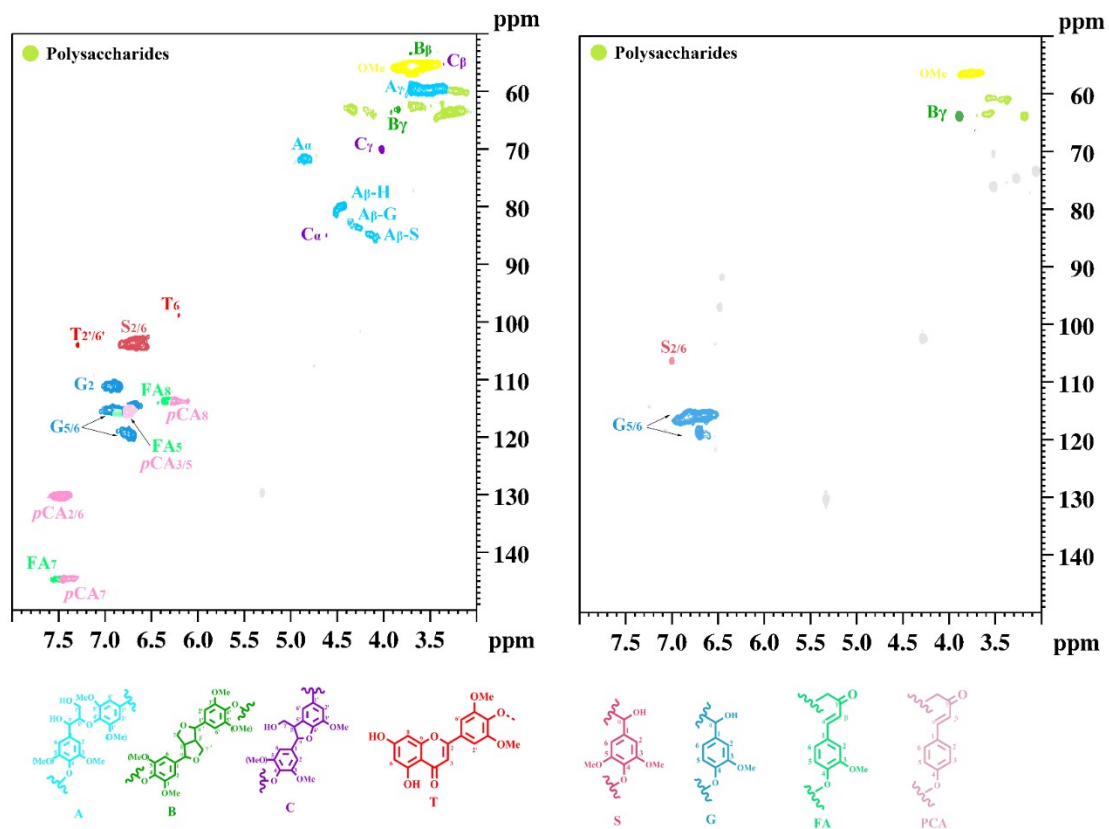

**Fig. S21.** The 2D-HSQC NMR spectra of the bamboo lignin in deuterated DMSO ( $\text{DMSO-}d_6$ ) before and after reaction.

**Table S1.** The transformation of *p*-coumaric acid in the presence of different amines. <sup>[a]</sup>

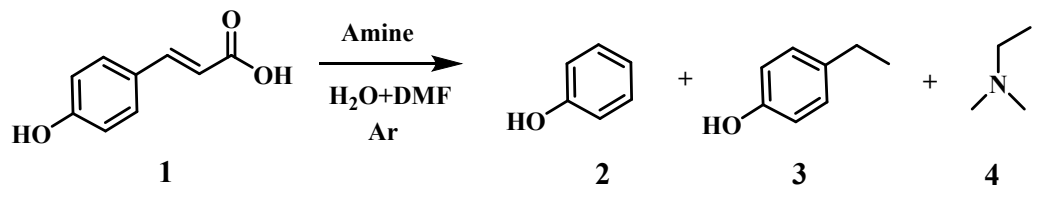

  
**8a:** 80.4% **2**  
 6.8% **3**  
 63.7% **4**  
 Conv.: >99%

  
**8d:** 85.5% **2**  
 5.1% **3**  
 69.2% **4**  
 Conv.: >99%

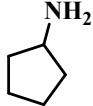  
**8g:** 73.4% **2**  
 13% **3**  
 56.5% **4**  
 Conv.: >99%

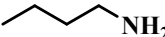  
**8b:** 81.6% **2**  
 7.2% **3**  
 62.9% **4**  
 Conv.: >99%

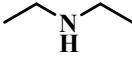  
**8e:** 87.3% **2**  
 4.3% **3**  
 74.5% **4**  
 Conv.: >99%

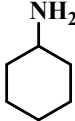  
**8h:** 67.4% **2**  
 19.3% **3**  
 52.7% **4**  
 Conv.: >99%

  
**8c:** 83.7% **2**  
 6.5% **3**  
 71.4% **4**  
 Conv.: >99%

  
**8f:** 79.8% **2**  
 9.5% **3**  
 60.1% **4**  
 Conv.: >99%

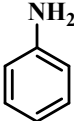  
**8i:** 60.5% **2**  
 22.4% **3**  
 47.2% **4**  
 Conv.: >99%

[a] Reaction conditions: 0.6 mmol substrate, 24 mmol amines, 1.5 g water, 1.5 mL DMF, 473 K, 1 MPa Ar, 4 h.



**Table S2.** The transformation of *p*-coumaric acid in the presence of ammonia. <sup>[a]</sup>

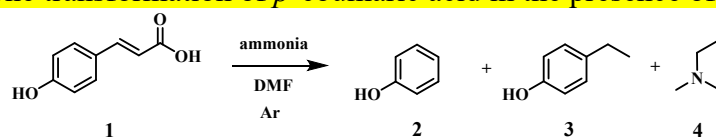

| The amount of ammonia [g] | Conv. [%] | Yield [%] |      |       |
|---------------------------|-----------|-----------|------|-------|
|                           |           | 2         | 3    | 4     |
| 0                         | 14.5      | 0.7       | 12.1 | trace |
| 2                         | 52.1      | 15.5      | 33.3 | 12.1  |

[a] Reaction conditions: 0.6 mmol substrate, 30 wt% ammonia (2 g), 2 mL DMF, 1 MPa Ar, 200 °C, 1 h.

**Table S3.** Optimization of the reaction parameters. <sup>[a]</sup>

| Entry | DMA:Substrate<br>[mol/mol] | DMF [mL] | Conv. [%] | Y <sub>2</sub> [%] | Y <sub>3</sub> [%] | Y <sub>4</sub> [%] |
|-------|----------------------------|----------|-----------|--------------------|--------------------|--------------------|
| 1     | 40                         | 0        | >99       | 54.3               | 3.8                | 0                  |
| 2     | 40                         | 0.5      | >99       | 85.1               | 4.5                | 84.2               |
| 3     | 40                         | 1        | >99       | 86.5               | 3.4                | 83.1               |
| 4     | 40                         | 1.5      | >99       | 89.3               | 6.2                | 85.2               |

[a] Reaction conditions: 0.6 mmol substrate, 40 wt% DMA in water (2.5 g), 473 K, 1MPa Ar, 1

h.
